# Supplementary material
Source: PubMed Central journal article supplement (PMC7845451)
Supplement: NIHMS1664808-supplement-Supp_Table_1.pdf [file NIHMS1664808-supplement-Supp_Table_1.pdf]

**Table S1.** Definitions of adverse pregnancy outcomes in the current study.

| <b>Outcome</b>                                      | <b>Definition</b>                                                                                                                                                                                                                    |
|-----------------------------------------------------|--------------------------------------------------------------------------------------------------------------------------------------------------------------------------------------------------------------------------------------|
| Preeclampsia                                        | Diagnostic criteria established by the MFMU Network which varied depending on the presence of hypertension or proteinuria at baseline (Table 1); ACOG category 1*                                                                    |
| Early-onset preeclampsia                            | Preeclampsia with onset at < 35 weeks gestation                                                                                                                                                                                      |
| Chronic hypertension with superimposed preeclampsia | Women with chronic hypertension before pregnancy that developed preeclampsia; ACOG category 3*                                                                                                                                       |
| Gestational hypertension                            | Onset of hypertension (systolic blood pressure $\geq 140$ mmHg or diastolic blood pressure $\geq 90$ mmHg on 2 occasions at least 4 hours apart) during pregnancy for women who were normotensive before pregnancy; ACOG category 4* |
| Preterm birth                                       | Live birth at 24 to <37 weeks gestation                                                                                                                                                                                              |
| Moderate preterm birth                              | Live birth at 24 to <35 weeks gestation                                                                                                                                                                                              |
| Spontaneous preterm birth                           | Preterm birth after spontaneous preterm labor with intact membranes or spontaneous premature (prelabor) rupture of membranes                                                                                                         |
| Indicated preterm births                            | Preterm birth that was not spontaneous                                                                                                                                                                                               |

\*American Congress of Obstetricians and Gynecologists (ACOG) classifications for hypertensive disorders of pregnancy.<sup>19</sup>
